# Supplementary material for: Design, synthesis, and biological evaluation of novel androst-17β-amide structurally related compounds as dual 5α-reductase inhibitors and androgen receptor antagonists
Source: PubMed Central journal article supplement (PMC6735293; doi:10.1080/14756366.2019.1654469), 2019-08-30

## Supporting Information

### **Design, Synthesis and Biological Evaluation of Novel androst-17 $\beta$ -amide structurally related compounds as Dual 5 $\alpha$ -reductase Inhibitors and Androgen Receptor Antagonists**

Kejing Lao<sup>a,b,c</sup>, Guoliang Xun<sup>d</sup>, Xingchun Gou<sup>a\*</sup>, Hua Xiang<sup>b,c\*</sup>

<sup>a</sup>*Institute of Basic and Translational Medicine & Shaanxi Key Laboratory of Brain Disorders, Xi'an Medical University, No.1 Xinwang Road, Xi'an, 710021, PR China*

<sup>b</sup>*Jiangsu Key Laboratory of Drug Design and Optimization, China Pharmaceutical University, 24 Tongjiaxiang, Nanjing 210009, PR China*

<sup>c</sup>*Department of Medicinal Chemistry, School of Pharmacy, China Pharmaceutical University, 24 Tongjiaxiang, Nanjing 210009, PR China*

<sup>d</sup>*Shanghai Abbisko Therapeutics Co., Ltd*

\* Corresponding author. Tel.: +86 29 86177603; Fax: +86 29 86177603 (X. Gou) and Tel.: +86 025 83271096; Fax: +86 025 83271096 (H. Xiang). E-mail addresses: gxchun@126.com (X. Gou) and xianghua@cpu.edu.cn (H. Xiang).







7d

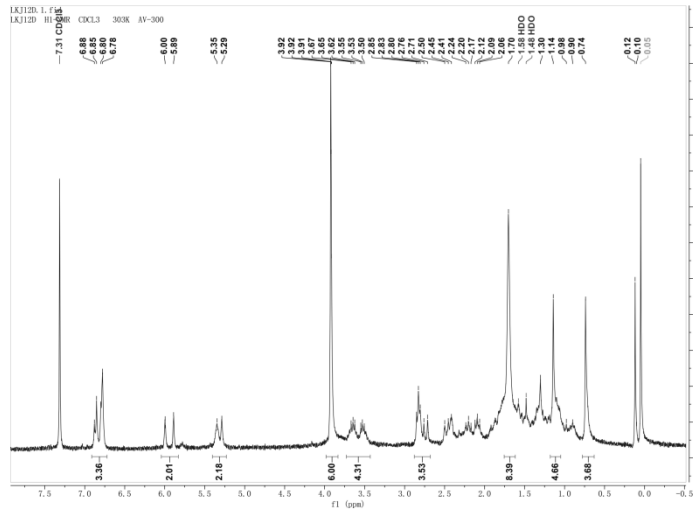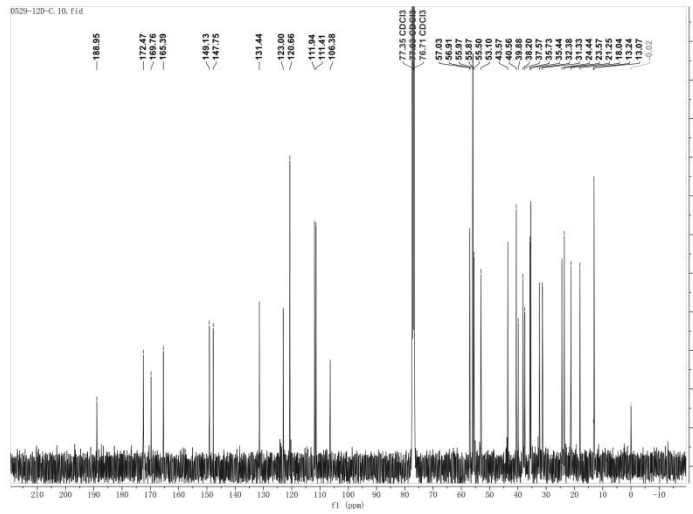

| Sample Name | Position          | PD2     | Instrument Name |
|-------------|-------------------|---------|-----------------|
| User Name   | Eng Val           | 0.05    | Instrument 1    |
| Sample Type | 201108-HSonly.p.m | Success | Data Filename   |
| Acq Method  |                   |         | Acquired Time   |

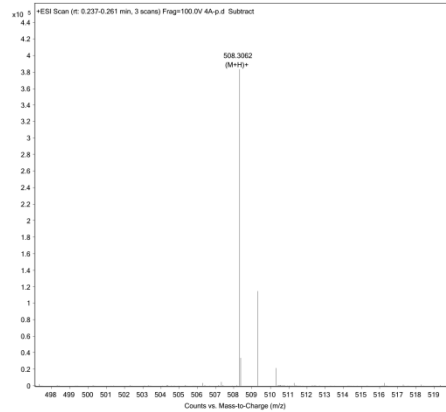



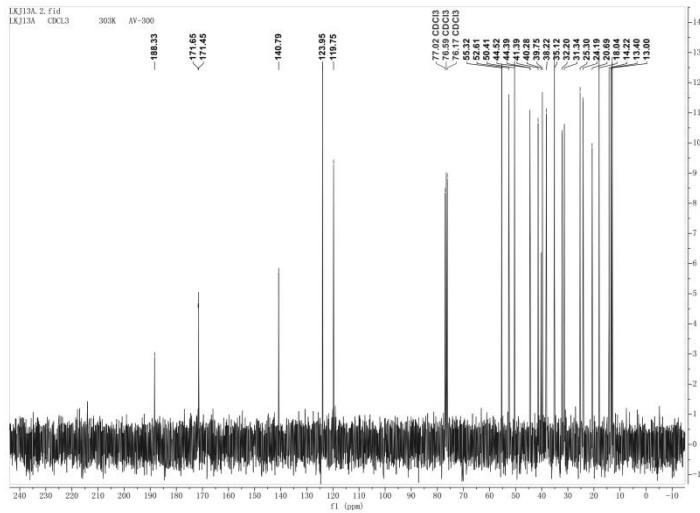

| Sample Name | Position               | FXC3    | Instrument Name | Instrument 1                    |
|-------------|------------------------|---------|-----------------|---------------------------------|
| User Name   | log wal                | 0.05    | HighResolution  |                                 |
| Sample Type | SRM Calibration Status | Success | Data Filename   | 38.p.d                          |
| ACQ Method  | Comment                |         | Acquired Time   | 5/9/2017 2:19:52 PM (UTC+08:00) |

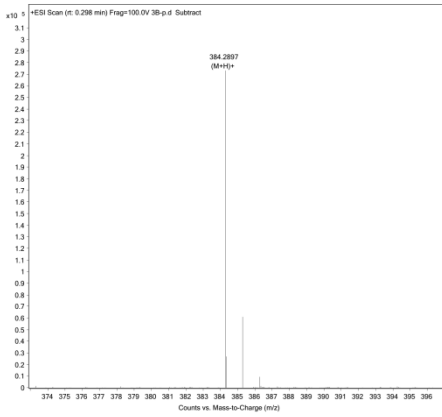

8b

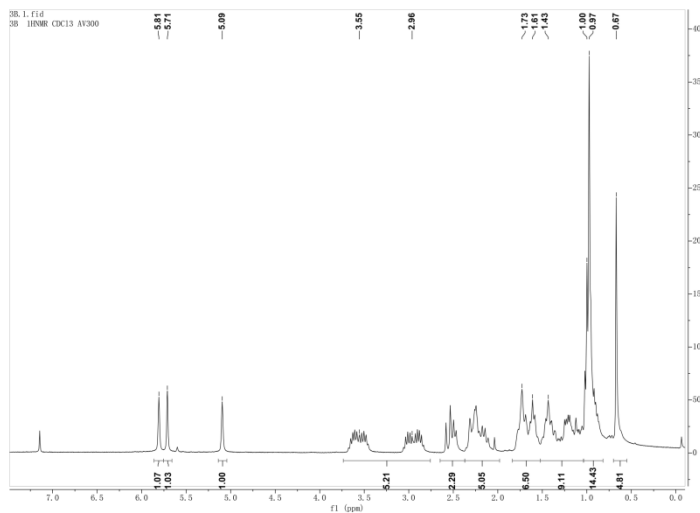

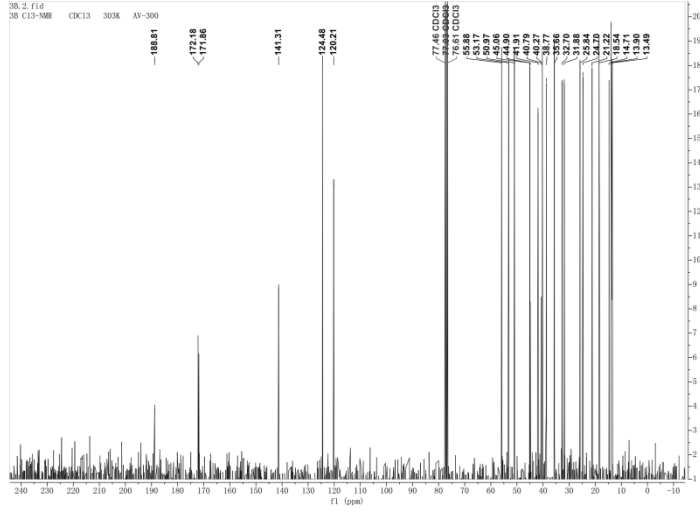

| Sample Name | Position               | PICS    | Instrument Name |
|-------------|------------------------|---------|-----------------|
| User Name   | Eng Val                | 0.05    | HighResolution  |
| Sample Type | SRM Calibration Status | Success | Data Filename   |
| ACQ Method  | Comment                |         | Acquired Time   |

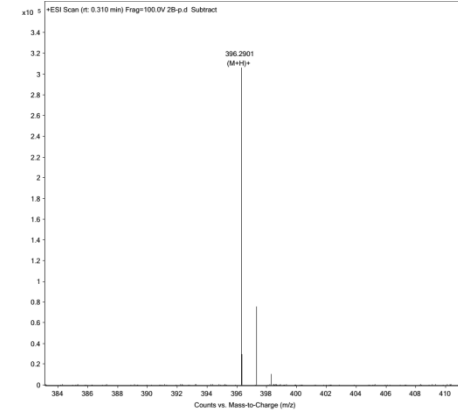

8c

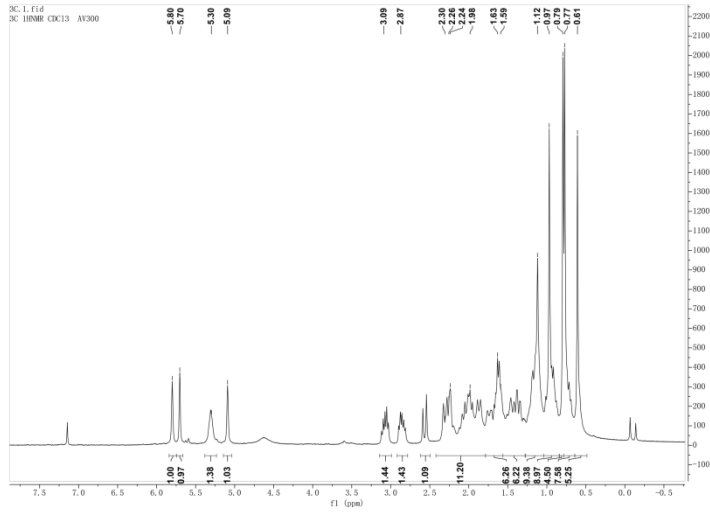



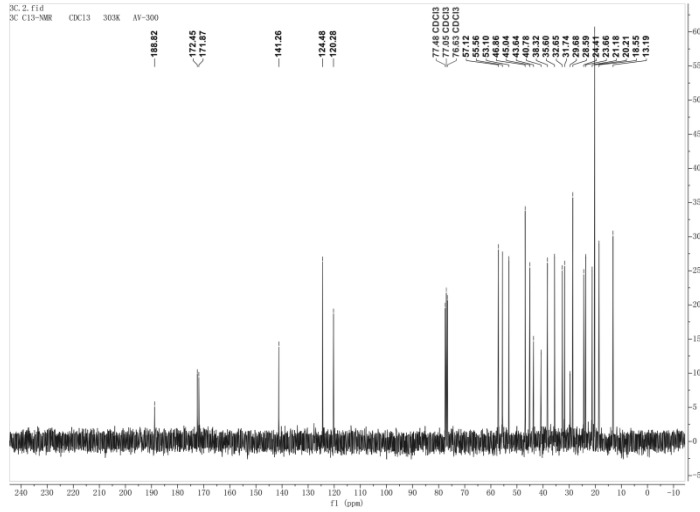

| Sample Name | Position           | PD6                    | Instrument Name | Instrument 1                    |
|-------------|--------------------|------------------------|-----------------|---------------------------------|
| User Name   | log Met            | 0.05                   | HighResolution  |                                 |
| Sample Type | Sample             | SRM Calibration Status | Data Filename   | SR.p.d                          |
| Acq Method  | 2011010-HSonly.p.m | Comment                | Acquired Time   | 5/9/2017 2:39:13 PM (UTC+08:00) |

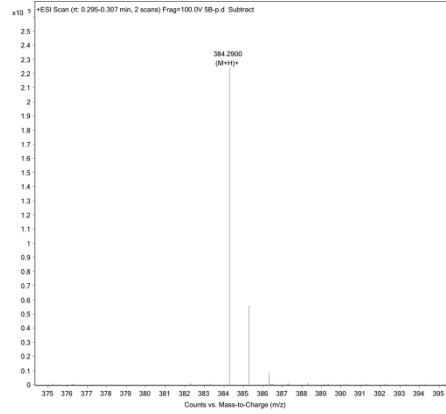

8d

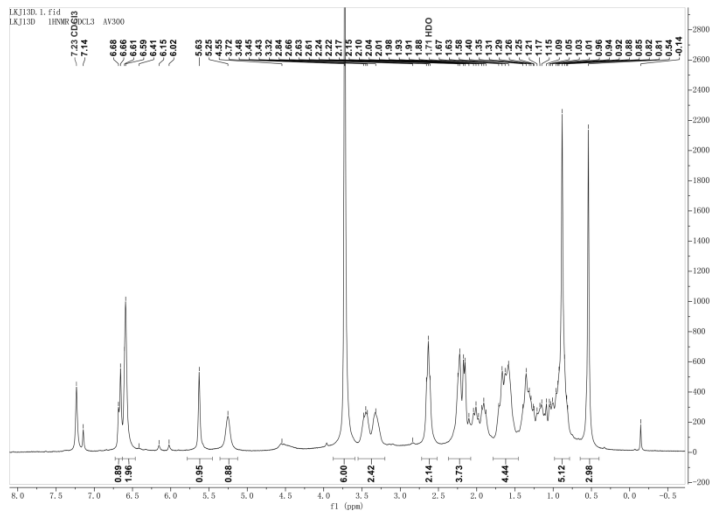











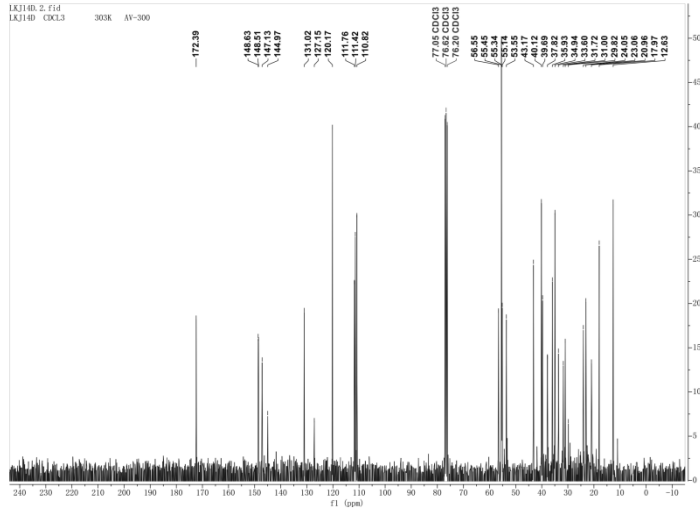

| Sample Name | Position               | PDH     | Environment Name                | Instrument 1  |
|-------------|------------------------|---------|---------------------------------|---------------|
| User Name   | Ag Sid                 | 0.20    | HighResolution                  | 4C-p.d        |
| Sample Type | IBM Calibration Status | Success | Data Filename                   | Acquired Time |
| ACQ Method  | 20110418-HSonly-p.m    | Comment | 5/9/2017 2:32:57 PM (UTC+08:00) |               |

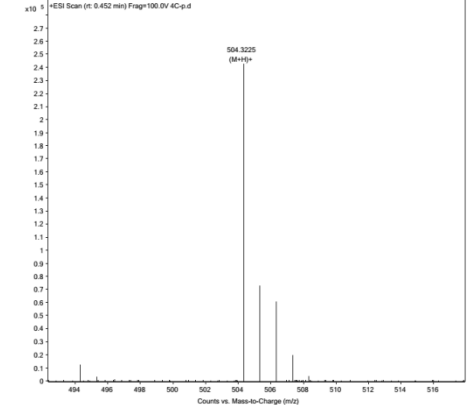

9e

46  
L0538036 CDCL3 1HNMR AV300

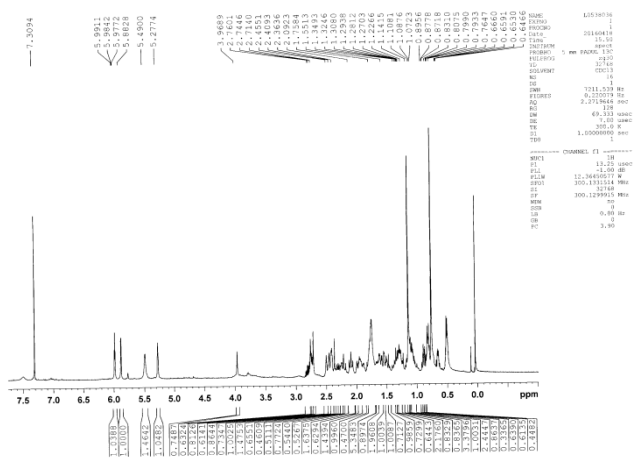

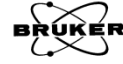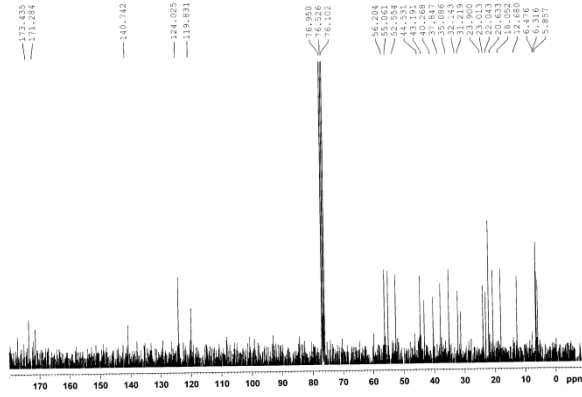

```

NAME      L0538036
EXPNO     2
PROCNO    2016043
DATE_     15.55
INSTRUM   spect
PROBHD    5 mm P400C 1H
PULPROG   zgpg30
TD         65536
SOLVENT   CDCl3
NS         128
DS         16444.664 Hz
FIDRES    0.234333 Hz
AQ         1.3643300 sec
RG         30
SWH        30.000 uspec
WDW         0.00 uspec
SSB         300.0 F
GB          0.0000000 sec
PC         0.03000000 sec
TSD

===== CHANNEL f1 =====
NUC1       13C
P1         12.40 usec
PL1        0.00 dB
PL12       42.3743193 W
SFO1       75.475223 MHz

===== CHANNEL f2 =====
CPDPRG2   waltz16
NUC2       1H
PCPD2     80.00 usec
PL2        1.00 dB
PL12       14.00 dB
PL13       17.3843077 W
PL14       0.3388211 W
PL15       0.34054623 W
SFO2       300.1312023 MHz
SI         32768
SF         75.4477843 MHz
WDW         0
SSB         1.00 Hz
GB          0
PC         1.00
    
```

| Sample Name | Position               | Instrument Name | Instrument 1  |
|-------------|------------------------|-----------------|---------------|
| User Name   | log had                | highreslab      | SC-p.d        |
| Sample Type | IBM Calibration Status | Success         | Data Filename |
| ACQ Method  | 20110418-HSonly-p.m    | Comment         | Acquired Time |

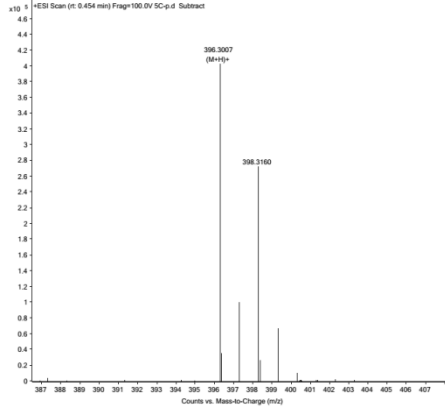

Supplement: IENZ_A_1654469_SM5909.pdf [file IENZ_A_1654469_SM5909.pdf]
